1 Macroevolutionary trade-offs in plant-feeding insects

2 Daniel A. Peterson,<sup>1</sup> Nate B. Hardy,<sup>2</sup> and Benjamin B. Normark<sup>1</sup>

3

4 <sup>1</sup>Department of Biology and Graduate Program in Organismic and Evolutionary Biology, 221 Morrill  
5 Science Center, 611 North Pleasant Street, University of Massachusetts, Amherst, MA 01003

6 <sup>2</sup>Department of Entomology & Plant Pathology, 321 Funchess Hall, Auburn University, Auburn,  
7 Alabama 36849

8

9 **Corresponding Author.** Daniel Peterson, Department of Biology, 221 Morrill Science Center, 611  
10 North Pleasant Street, University of Massachusetts, Amherst, MA 01003.

11 Phone: (413) 545-2844. Email: [dapeters@cns.umass.edu](mailto:dapeters@cns.umass.edu)

## 12 **Abstract**

13           Most plant-feeding insects are ecological specialists restricted to one or a few closely related  
14 host-plant species. A long-standing hypothesis asserts that natural selection favors host specialization  
15 because of trade-offs between performance on alternative hosts, yet empirical evidence for such trade-  
16 offs is scarce. Here we assess trade-offs between adaptations to alternative hosts over  
17 macroevolutionary timescales in two major orders of plant-feeding insects: Lepidoptera (caterpillars)  
18 and Hemiptera (true bugs). Across 1604 caterpillar species, we find both positive and negative  
19 associations between presence on diverse host taxa. The patterns of these associations suggest that  
20 different trade-offs constrain host-use over short and long evolutionary timescales. In contrast, host-use  
21 patterns of 955 true bug species reveal uniformly positive associations between adaptations to the same  
22 host taxa over both timescales. The lack of consistent patterns across timescales and insect orders  
23 indicates that host-use trade-offs are historically contingent rather than universal constraints. Moreover,  
24 we observe only broad trade-offs, suggesting that alternative evolutionary processes drive the high  
25 degree of ecological specialization observed in most plant-feeding insects.

## 26 **Introduction**

27           The ubiquity of ecological specialists (1, 2) is often attributed to evolutionary constraints on  
28 generalism (3, 4). Adaptations to one environment may come at the cost of performance in other  
29 environments (1, 3), and such trade-offs are crucial elements of most theoretical models of the  
30 evolution of specialization (5). Trade-offs are implied by negative correlations between traits in many  
31 biological systems (6), but in plant-feeding insects, performance measures on alternative host species  
32 are most often uncorrelated or positively correlated (1, 7). In fact, although plant-feeding insects are a  
33 model system for the study of ecological specialization (1, 3), the role of trade-offs in the evolution of  
34 insect host-specialization remains generally unsupported.

35           However, trade-offs that drive specialization in plant-feeding insects may be difficult to detect  
36 within species (8). Host-use traits are phylogenetically conserved in many insect groups (9), and  
37 genetic variation for use of novel hosts is often absent within a single population (4). These constraints  
38 on host-use variation likely stem from the fact that host use is a complex trait involving multiple  
39 interacting genetic loci (10), so the evolutionary trajectories that lead to high fitness on alternative  
40 resources may be mutually exclusive. For example, the evolution of improved performance on one host  
41 can select for a preference for that host, driving a positive feedback loop of further specialization (11).  
42 When epistatic interactions are strong, the greatest variation in host-use strategies will evolve between  
43 reproductively isolated lineages over long time scales (12), with trade-off outcomes determined by each  
44 lineage's evolutionary history (13). Analogous macroevolutionary trade-offs have been described in  
45 plants; the presence of alternative defensive strategies are negatively correlated over plant evolutionary  
46 history (14). However, it remains unknown whether this functional diversification across hosts has  
47 created macroevolutionary trade-offs for plant-feeding insects; performance on alternative hosts may  
48 instead be positively associated if generalist adaptations have been prevalent during the evolution of  
49 insect herbivores (15).

50           We investigated trade-offs between adaptations to diverse host taxa over long- and short-term

51 macroevolutionary timescales in two orders of plant-feeding insects: Lepidoptera (caterpillars) and  
52 Hemiptera (true bugs). Assuming that trade-offs should produce negative correlations between  
53 observed use of alternative host taxa for individual insect species (15), we quantified the  
54 macroevolutionary relationships between use of the most common host-plant orders in North America.  
55 We assembled the pairwise correlations between use of the focal hosts to produce network graphs of  
56 host-use relationships, revealing overall patterns of host-use evolution in each insect order. Specifically,  
57 we investigated two plausible trade-off scenarios: segregation of host orders into discrete clusters and  
58 isolation of individual host orders.

## 59 **Results**

60 **Host-use in Lepidoptera and Hemiptera.** We obtained North American host-use records and  
61 phylogenetic data for 1604 caterpillar species and 955 bug species from online databases. Eleven host-  
62 plant orders met our prevalence cut-off of 100 species from one insect order, and each of them met the  
63 cut-off for both Hemiptera and Lepidoptera: Asterales, Caryophyllales, Ericales, Fabales, Fagales,  
64 Lamiales, Malpighiales, Pinales, Poales, Rosales, and Sapindales. Interactions with these focal host-  
65 plant orders accounted for 77% of total interactions in the Lepidoptera dataset and 57% of total  
66 interactions in the Hemiptera dataset.

67 **Host-use Correlations.** We inferred a time-calibrated phylogeny of each insect order (Fig. 1) and used  
68 a phylogenetic meta-analysis approach to test for evolutionary trade-offs between insect use of the  
69 focal host-plant orders. For each pairwise combination of focal host-plant orders, we estimated long-  
70 and short-term evolutionary associations between use of the two host taxa by finding maximum  
71 likelihood estimates for phylogenetic and residual correlations between host-use traits in a phylogenetic  
72 mixed model (Fig. 2A-F). We recovered both positive and negative correlations between use of the  
73 focal host orders in the Lepidoptera (Fig. 2G), but mostly positive correlations in the Hemiptera (Fig.  
74 2H).

75 **Host-use Network Structure.** We used the pairwise host-use correlations to reconstruct the overall

76 network of host-use correlations over phylogenetic and residual timescales in each insect order. We  
77 then evaluated the structure of each network to identify clusters of evolutionarily associated host taxa  
78 as well as individually isolated host taxa. We found that the network of long-term evolutionary  
79 relationships between lepidopteran use of the focal host orders was significantly structured ( $P < 0.01$ ),  
80 revealing two large clusters of host taxa (Fig. 3a). Cluster membership was phylogenetically diverse:  
81 the gymnosperm order Pinales (conifers) and monocot order Poales (grasses) were each affiliated with  
82 a different set of eudicot orders. Short-term correlations between lepidopteran use of the focal host taxa  
83 also showed significant network structure ( $P < 0.01$ ) but on this timescale use of all angiosperm hosts  
84 formed a single cluster of mostly positive associations (Fig. 3b). However, use of Pinales was isolated  
85 from the angiosperm cluster, exhibiting a statistically significant mean pairwise correlation with use of  
86 the other focal hosts ( $-0.23$ ,  $P < 0.01$ ). In contrast, hemipteran host-use correlations indicated  
87 significant support for a single host-use cluster encompassing all focal hosts over both phylogenetic ( $P$   
88  $< 0.01$ , Fig. 3c) and residual timescales ( $P < 0.01$ , Fig. 3d).

89

## 90 **Discussion**

91 A fundamental trade-off between performance on alternative hosts remains the dominant  
92 hypothesis to explain the planet's abundance of specialized plant-feeding insects, despite the lack of  
93 empirical evidence for such trade-offs. Most studies have looked for trade-offs within insect species,  
94 but the effects of trade-offs could be more obvious over longer evolutionary timescales (8). Our results  
95 suggest that trade-offs have shaped patterns of host-use over millions of years of caterpillar evolution  
96 and diversification. However, the lack of evidence for trade-offs among plant-feeding bugs indicates  
97 that trade-offs are not universal, immutable constraints, but instead reflect historically contingent  
98 processes in individual insect lineages.

99 There are many differences between Lepidoptera and Hemiptera, but their fundamentally  
100 distinct relationships with host plants may be particularly important to understanding why the role of

101 trade-offs appears to be very different in the two groups. Hemiptera are sucking insects, while  
102 Lepidoptera are generally leaf-chewers (2). These two feeding modes elicit different modes of plant  
103 defensive responses (16), and sap-sucking may be particularly amenable to generalist adaptations that  
104 circumvent host defenses (17). In contrast, Lepidoptera often rely on specialized enzymes to detoxify  
105 defensive chemicals (18), which may constrain the evolution of generalism, although super-generalist  
106 Lepidoptera do exist, possibly powered by phenotypic plasticity in enzyme expression (19).

107         Alternatively, defense chemistry may have little influence over long-term evolutionary  
108 relationships between plants and their insect parasites. In fact, we found that long-term evolutionary  
109 trade-offs experienced by lepidopteran lineages appear to reflect a broad-scale ecological division  
110 between plant hosts rather than a history of coevolution between plants and insects (20). The relevant  
111 differences between the two host clusters we observed are not immediately clear, but the separation of  
112 predominantly woody plant taxa (e.g. Pinales, Fagales) from predominantly herbaceous taxa (e.g.  
113 Asterales, Poales) suggests the possibility of a trade-off between host growth forms or between the  
114 habitat types where those growth forms are found (21).

115         Although we observed few constraints on short-term evolution of lepidopteran host-use within  
116 the focal angiosperm taxa, we did find evidence for a short-term evolutionary trade-off between their  
117 use of angiosperms and the only focal gymnosperm host order, Pinales (conifers). We found that  
118 conifers and some angiosperms are used by caterpillars with similar evolutionary backgrounds, yet a  
119 trade-off between evolutionarily labile traits tends to prevent the simultaneous use of those host taxa by  
120 individual caterpillar species. Such trade-offs between labile but mutually exclusive host-use traits may  
121 be particularly significant because they can promote rapid speciation (22), driving the adaptive  
122 radiations that have produced much of the plant-feeding insect diversity on earth (23, 24).  
123 Nevertheless, the prevalence of such constraints at smaller scales, for instance between alternative host  
124 genera or species, remains unclear given that the single short-term trade-off observed here occurred  
125 over the largest phylogenetic distance present among our focal taxa.

126 In contrast to the patterns observed in the Lepidoptera, hemipteran host-use showed no evidence  
127 of trade-offs over long or short evolutionary timescales. This surprising result suggests that generalist  
128 adaptations that increase fitness across multiple hosts have been more important for Hemiptera than  
129 specialist adaptations to particular hosts (15). Moreover, hemipteran generalism appears completely  
130 unrestrained by host taxonomy even over very long timescales, leading to the evolution of both super-  
131 generalist species and clades where generalist strategies are common (25). However, we do not account  
132 for differences in fecundity between specialist and generalist insects on particular hosts; it may be that  
133 generalists usually have lower fitness – i.e. they are jacks of all trades but masters of none (3).  
134 Nevertheless, costs of generalism have been difficult to document (1, 26), so the positive residual  
135 correlations we observed may instead represent evolutionary breakthroughs made possible by novel  
136 mechanisms of phenotypic plasticity or other generalist adaptations (17).

137 Overall, we found strong evidence that both labile traits and long-term, historically contingent  
138 evolutionary processes produce important host-use constraints in plant-feeding insects. However, the  
139 relatively few, broad-scale trade-offs found here fail to explain the observation that a vast majority of  
140 plant-feeding insects are restricted to a single host family (2). It is clear that trade-offs can vary based  
141 on genetic context (13), so we cannot rule out the hypothesis that species-specific, idiosyncratic trade-  
142 offs drive ecological specialization. Nevertheless, although a few individual species-specific trade-offs  
143 have been documented (22), our results suggest that most microevolutionary trade-offs do not persist  
144 over macroevolutionary timescales. Trade-offs play an intuitive and possibly inescapable role in  
145 constraining performance across multiple tasks (6), yet host-specialization in plant-feeding insects is  
146 not necessarily driven by host-specific limitations on survival and growth. Alternative factors, such as  
147 neural constraints (27), mate-finding (28), or genetic drift (26) may ultimately shape the evolution of  
148 each species' ecological niche.

149

150 **Materials and Methods**

151 **Data Collection.** Lepidopteran host-use data were downloaded from the HOSTS database  
152 ([nhm.ac.uk/hosts](http://nhm.ac.uk/hosts))(29), a collection of published records of worldwide caterpillar host-plants.  
153 Hemipteran host-use data were downloaded from the Tri-Trophic Thematic Collection Network  
154 database ([tcn.amnh.org](http://tcn.amnh.org)), a compilation of insect collection records from academic and governmental  
155 museums in the United States. For both datasets, we restricted our analysis to records from North  
156 America (all localities labeled USA, Canada, Mexico or Nearctic). All plant taxonomic names were  
157 standardized with the Taxonomic Name Resolution Service (30) and insect taxonomic names with the  
158 python package TaxonNamesResolver and the following reference databases: Aphid Species File (31),  
159 Integrated Taxonomic Information System ([itis.gov](http://itis.gov)), and Catalogue of Life ([catalogueoflife.org](http://catalogueoflife.org)). We  
160 created binary presence/absence matrices of lepidopteran and hemipteran species by host plant taxon,  
161 with insects considered present on all hosts for which they had at least one host-use record. To focus  
162 computational resources on host taxa with enough statistical power to detect evolutionary host-use  
163 interactions, we restricted our analyses to focal host orders used by at least 100 insect species in one  
164 insect order (~10% of the total focal insect species per order).

165 We characterized shared ancestry among the North American lepidopteran and hemipteran  
166 species in our host-use dataset by estimating time-scaled phylogenies using a phyloinformatic approach  
167 (see Supplemental Materials for details). Phylogenetic data were not available for all species in the  
168 host-use dataset, but there was an overlap of host-use and phylogenetic data for 1604 lepidopteran  
169 species and 955 hemipteran species. Phylogenies and host-use matrices for these species are available  
170 on Dryad ([datadryad.org](http://datadryad.org)).

171 **Statistical Analysis.** Treating each pairwise comparison between host taxa individually, we set up a  
172 phylogenetic mixed model (32) for each insect order using the package MCMCglmm (33) in the R  
173 statistical framework (34). We estimated the evolutionary interaction between the pair of host-use traits  
174 using the “`random=~us(trait):Insect`” and “`rcov=~us(trait):units`” syntax to  
175 capture both phylogenetic and residual effects. Prior parameter distributions were specified as



176 `prior<-list (R=list (V=diag (2) , nu=2) ,`  
177 `G=list (G1=list (V=diag (2) , nu=2) ) )`". All MCMC chains were run for 10 million iterations  
178 with a burn-in of 1 million iterations, and ten chains were run for each model to test for convergence.  
179 Gelman-Rubin convergence analysis of the ten chains for each model produced potential scale  
180 reduction factors under 1.05 in every case (99% were under 1.01), suggesting that all chains  
181 successfully converged (35).

182 We considered two potential trade-off scenarios: isolation of individual host-use traits, and  
183 divisions of host-use traits into clusters (characterized by positive interactions within clusters and  
184 negative interactions between them). To characterize isolation of individual host-use traits, we  
185 calculated the mean correlation of the ten pairwise comparisons involving each host-use trait  
186 (separately for phylogenetic and residual correlations). To characterize associations among groups of  
187 host-use traits, we found the network structure that maximized the structure score for the entire network  
188 of host-use traits, defined as the sum of all pairwise correlations between host-use traits in the same  
189 cluster minus the sum of all pairwise correlations between host-use traits in different clusters (see  
190 Supplemental Materials for details).

191 We tested the statistical significance of the resulting values by producing a series of 100 null  
192 datasets that simulated independent Brownian motion of a continuous character for performance on  
193 each host order along the insect phylogenies, plus additional normally distributed residual variation  
194 with equivalent variance. We converted the resulting continuous host performance values to a binary  
195 host presence/absence character by assuming that only the insect species with the highest performance  
196 values for each host taxon were present on that host, with the threshold set by matching the number of  
197 species using that host in the empirical data (36). We then calculated all pairwise correlations between  
198 use of the focal hosts, mean correlations per host-use trait, and whole-network structure as we did for  
199 the empirical data. Empirical individual host-use trait mean correlations were considered statistically  
200 significant when their absolute values exceeded the maximum absolute values of any individual mean

201 in 95% of null datasets. Empirical network structures was considered statistically significant when their  
202 scores exceeded the network structure scores of 95% the null datasets.

203

204 **Supplementary Information** is available in the online version of the paper.

205

206 **Acknowledgements** We thank D. Moen, A. Porter, L. Doubleday, and S. Noda for comments that  
207 improved the manuscript. This work was supported by the National Science Foundation (EF-1115191  
208 and DEB-1258001)

209

210 **Author Contributions** All authors were involved in the study design and wrote the manuscript. D.A.P.  
211 and N.B.H. analyzed the data.

212

213 **Author Information** The authors declare no competing financial interests. Correspondence and  
214 requests for materials should be addressed to D.A.P. (dapeters@cns.umass.edu)

215

## 216 **Literature Cited**

- 217 1. Forister ML, Dyer LA, Singer M, Stireman JO, Lill JT (2012) Revisiting the evolution of  
218 ecological interactions. *Ecology* 93:981–991.
- 219 2. Forister ML et al. (2015) The global distribution of diet breadth in insect herbivores. *Proc Natl*  
220 *Acad Sci U S A* 112:442–7.
- 221 3. Futuyma DJ, Moreno G (1988) The evolution of ecological specialization. *Annu Rev Ecol Syst*  
222 19:207–233.
- 223 4. Futuyma DJ, Keese M, Funk DJ (1995) Genetic constraints on macroevolution: the evolution of  
224 host affiliation in the leaf beetle genus *Ophraella*. *Evolution* 49:797–809.
- 225 5. Ravné V, Dieckmann U, Olivieri I (2009) Live where you thrive: joint evolution of habitat  
226 choice and local adaptation facilitates specialization and promotes diversity. *Am Nat* 174:E141–  
227 E169.
- 228 6. Shoval O et al. (2012) Evolutionary trade-offs, Pareto optimality, and the geometry of

- 229 phenotype space. *Science* 336:1157–1160.
- 230 7. Futuyma DJ (2008) in *Specialization, Speciation, and Radiation: The Evolutionary Biology of*  
231 *Herbivorous Insects*, pp 136–147.
- 232 8. Joshi A, Thompson JN (1995) Trade-offs and the evolution of host specialization. *Evol Ecol*  
233 9:82–92.
- 234 9. Futuyma DJ, Agrawal AA (2009) Macroevolution and the biological diversity of plants and  
235 herbivores. *Proc Natl Acad Sci U S A* 106:18054–18061.
- 236 10. Remold S (2012) Understanding specialism when the jack of all trades can be the master of all.  
237 *Proc R Soc B Biol Sci* 279:4861–4869.
- 238 11. Fry J (1996) The evolution of host specialization: are trade-offs overrated? *Am Nat* 148:S84–  
239 107.
- 240 12. Satterwhite RS, Cooper TF (2015) Constraints on adaptation of *Escherichia coli* to mixed-  
241 resource environments increase over time. *Evolution* 69:2067–2078.
- 242 13. Rodriguez-Verdugo A, Carrillo-Cisneros D, Gonzalez-Gonzalez A, Gaut BS, Bennett AF (2014)  
243 Different tradeoffs result from alternate genetic adaptations to a common environment. *Proc*  
244 *Natl Acad Sci* 111:12121–12126.
- 245 14. Campbell SA, Kessler A (2013) Plant mating system transitions drive the macroevolution of  
246 defense strategies. *Proc Natl Acad Sci* 110:3973–3978.
- 247 15. Peterson DA et al. (2015) Phylogenetic analysis reveals positive correlations between  
248 adaptations to diverse hosts in a group of pathogen-like herbivores. *Evolution* 69:2785–2792.
- 249 16. Ali JG, Agrawal AA (2012) Specialist versus generalist insect herbivores and plant defense.  
250 *Trends Plant Sci* 17:293–302.
- 251 17. Barrett LG, Heil M (2012) Unifying concepts and mechanisms in the specificity of plant-enemy  
252 interactions. *Trends Plant Sci* 17:282–292.
- 253 18. Berenbaum MR, Feeny PP (2008) in *Specialization, Speciation, and Radiation: The*  
254 *Evolutionary Biology of Herbivorous Insects*, pp 3–19.
- 255 19. Li X, Schuler MA, Berenbaum MR (2002) Jasmonate and salicylate induce expression of  
256 herbivore cytochrome P450 genes. *Nature* 419:712–715.
- 257 20. Ehrlich PR, Raven PH (1964) Butterflies and plants: a study in coevolution. *Evolution* 18:586–  
258 608.
- 259 21. Futuyma DJ (1976) Food plant specialization and environmental predictability in Lepidoptera.  
260 *Am Nat* 110:285–292.
- 261 22. Nosil P, Crespi BJ, Sandoval CP (2002) Host-plant adaptation drives the parallel evolution of  
262 reproductive isolation. *Nature* 417:440–3.

- 263 23. Farrell BD (1998) “Inordinate fondness” explained: why are there so many beetles? *Science*  
264 281:555–559.
- 265 24. Janz N, Nylin S, Wahlberg N (2006) Diversity begets diversity: host expansions and the  
266 diversification of plant-feeding insects. *BMC Evol Biol* 6:4.
- 267 25. Normark BB, Johnson NA (2011) Niche explosion. *Genetica* 139:551–564.
- 268 26. Gompert Z et al. (2015) The evolution of novel host use is unlikely to be constrained by  
269 tradeoffs or a lack of genetic variation. *Mol Ecol* 24:2777–2793.
- 270 27. Bernays EA (2001) Neural limitations in phytophagous insects: implications for diet breadth  
271 and evolution of host affiliation. *Annu Rev Entomol* 46:703–727.
- 272 28. Hawthorne DJ, Via S (2002) The genetic architecture of ecological specialization: correlated  
273 gene effects on host use and habitat choice in pea aphids. *Am Nat* 159:S76–S88.
- 274 29. Robinson GS, Ackery PR, Kitching IJ, Beccaloni GW, Hernández LM (2015) HOSTS - a  
275 database of the world’s Lepidopteran hostplants. *Nat Hist Museum, London*.
- 276 30. Boyle B et al. (2013) The taxonomic name resolution service: an online tool for automated  
277 standardization of plant names. *BMC Bioinformatics* 14:16.
- 278 31. Favret C (2015) Aphid species file. Available at: [Aphid.SpeciesFile.org](http://Aphid.SpeciesFile.org) [Accessed January 1,  
279 2015].
- 280 32. Hadfield JD, Nakagawa S (2010) General quantitative genetic methods for comparative  
281 biology: Phylogenies, taxonomies and multi-trait models for continuous and categorical  
282 characters. *J Evol Biol* 23:494–508.
- 283 33. Hadfield JD (2010) MCMC methods for multi-response generalized linear mixed models: The  
284 MCMCglmm R package. *J Stat Softw* 33:1–22.
- 285 34. R Core Team (2015) R: A language and environment for statistical computing.
- 286 35. Gelman A, Rubin DB (1992) Inference from iterative simulation using multiple sequences. *Stat*  
287 *Sci* 7:457–472.
- 288 36. Felsenstein J (2012) A comparative method for both discrete and continuous characters using  
289 the threshold model. *Am Nat* 179:145–156.

290  
291

## 292 **Figure Legends**

293 Fig. 1. Maps of host-use traits on insect phylogenies. For each host-plant order, colored blocks indicate  
294 which insect species have been observed on that host. Insect species with no hosts shown were

295 observed only on non-focal hosts or had no host-use information associated with their locality records  
296 (Hemiptera only). Insect families (and one superfamily) are indicated around the phylogenies as  
297 follows: (A) Lepidoptera – 1: Noctuoidea, 2: Nymphalidae, 3: Lycaenidae, 4: Hesperidae, 5: Pyralidae,  
298 6: Sphingidae, 7: Saturniidae, 8: Geometridae, 9: Tortricidae, 10: Gracillariidae. (B) Hemiptera – 11:  
299 Cicadellidae, 12: Membracidae, 13: Cicadidae, 14: Miridae, 15: Tingidae, 16: Pentatomidae, 17:  
300 Scutelleridae, 18: Coreidae, 19: Rhopalidae, 20: Lygaeidae, 21: Delphacidae, 22: Fulgoridae, 23:  
301 Flatidae, 24: Aphididae, 25: Diaspididae, 26: Coccidae, 27: Pseudococcidae, 28: Psylloidea, 29:  
302 Aleyrodidae.

303

304 Fig. 2. Phylogenetic and residual evolutionary correlations between traits. Hypothetical scenarios of  
305 evolutionary correlation between herbivore presence on two hosts: (A) negative phylogenetic  
306 correlation, (B) positive phylogenetic correlation, (C) negative residual correlation, (D) positive  
307 residual correlation, (E) negative phylogenetic and positive residual correlations, (F) positive  
308 phylogenetic and negative residual correlations. In each example, red squares on the left indicate which  
309 species in the herbivore phylogeny are present on host 1, and blue squares on the right indicate which  
310 species are present on host 2. (G) Empirical phylogenetic correlation by residual correlation plots of all  
311 55 pairwise combinations of the focal host orders for Lepidoptera and (H) Hemiptera.

312

313 Fig. 3. Network graphs of inferred pairwise host-use correlations. (A) Lepidoptera – phylogenetic  
314 correlations. (B) Lepidoptera – residual correlations. (C) Hemiptera – phylogenetic correlations. (D)  
315 Hemiptera – residual correlations. Each vertex represents a host order, with vertex area proportional to  
316 the number of insects that were observed on that host. Positive interactions between presence on a pair  
317 of hosts are represented by solid, black lines and negative correlations by dashed, red lines, with line  
318 thickness proportional to the magnitude of the correlation. Network spatial structure was determined  
319 using the Kamada-Kawai algorithm (47), a force-directed layout method in which “repulsion” between

320 vertices was proportional to the inverse of one plus the correlation values between the respective hosts.

321 Vertices are labeled with the following abbreviations – Ast: Asterales, Car: Caryophyllales, Eri:

322 Ericales, Fab: Fabales, Fag: Fagales, Lam: Lamiales, Mal: Malpighiales, Pin: Pinales, Poa: Poales, Ros:

323 Rosales, Sap: Sapindales. Vertices are colored by taxonomic group – Eudicots: blue, Monocots: yellow,

324 Conifers: green. Statistically significant modules ( $P < 0.05$ ) are indicated by grey bubbles. Individual

325 host orders with mean correlations of significantly higher magnitude than expected ( $P < 0.05$ ) are

326 indicated by bold vertex outlines (black for positive means, red for negative means).

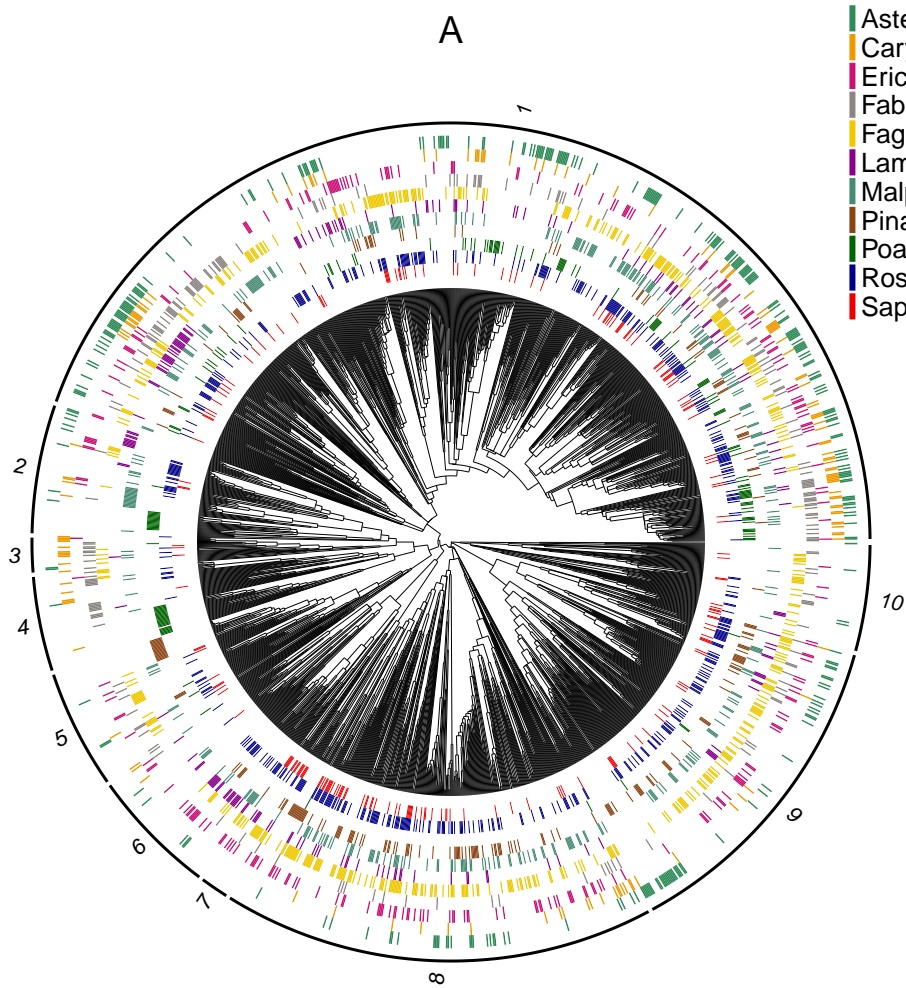

- Asterales
- Caryophyllales
- Ericales
- Fabales
- Fagales
- Lamiales
- Malpighiales
- Pinales
- Rosales
- Sapindales

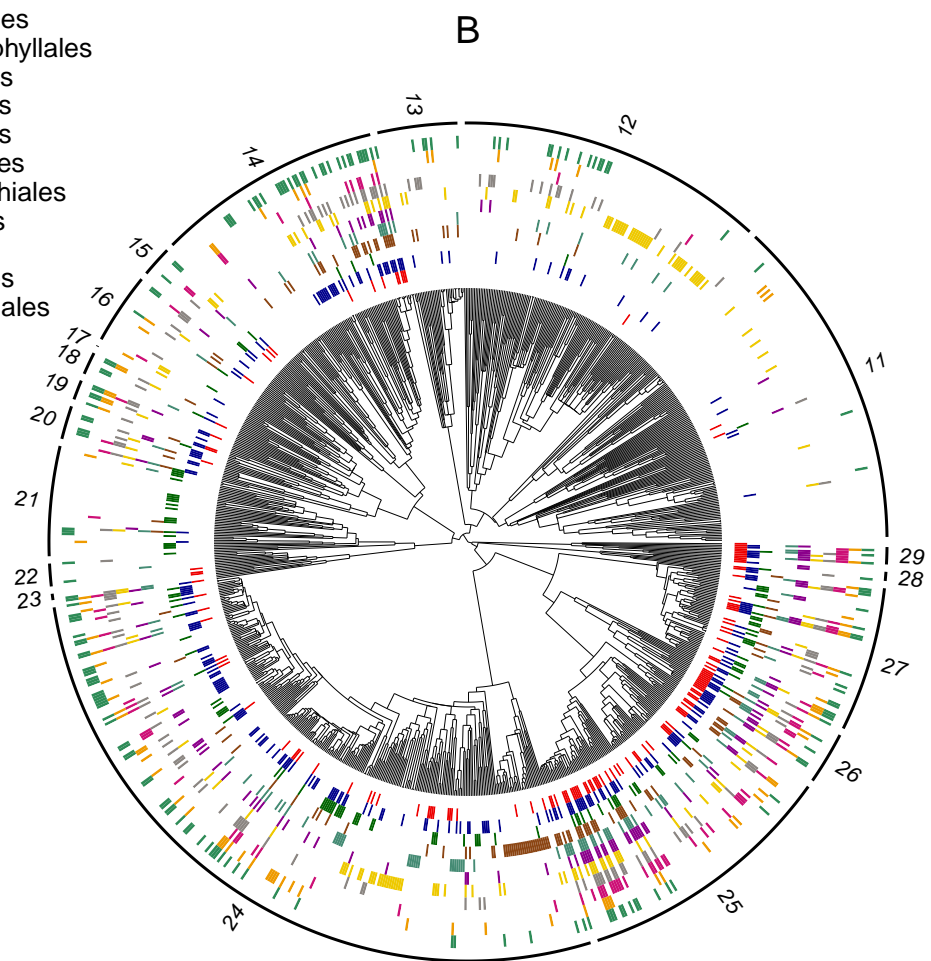

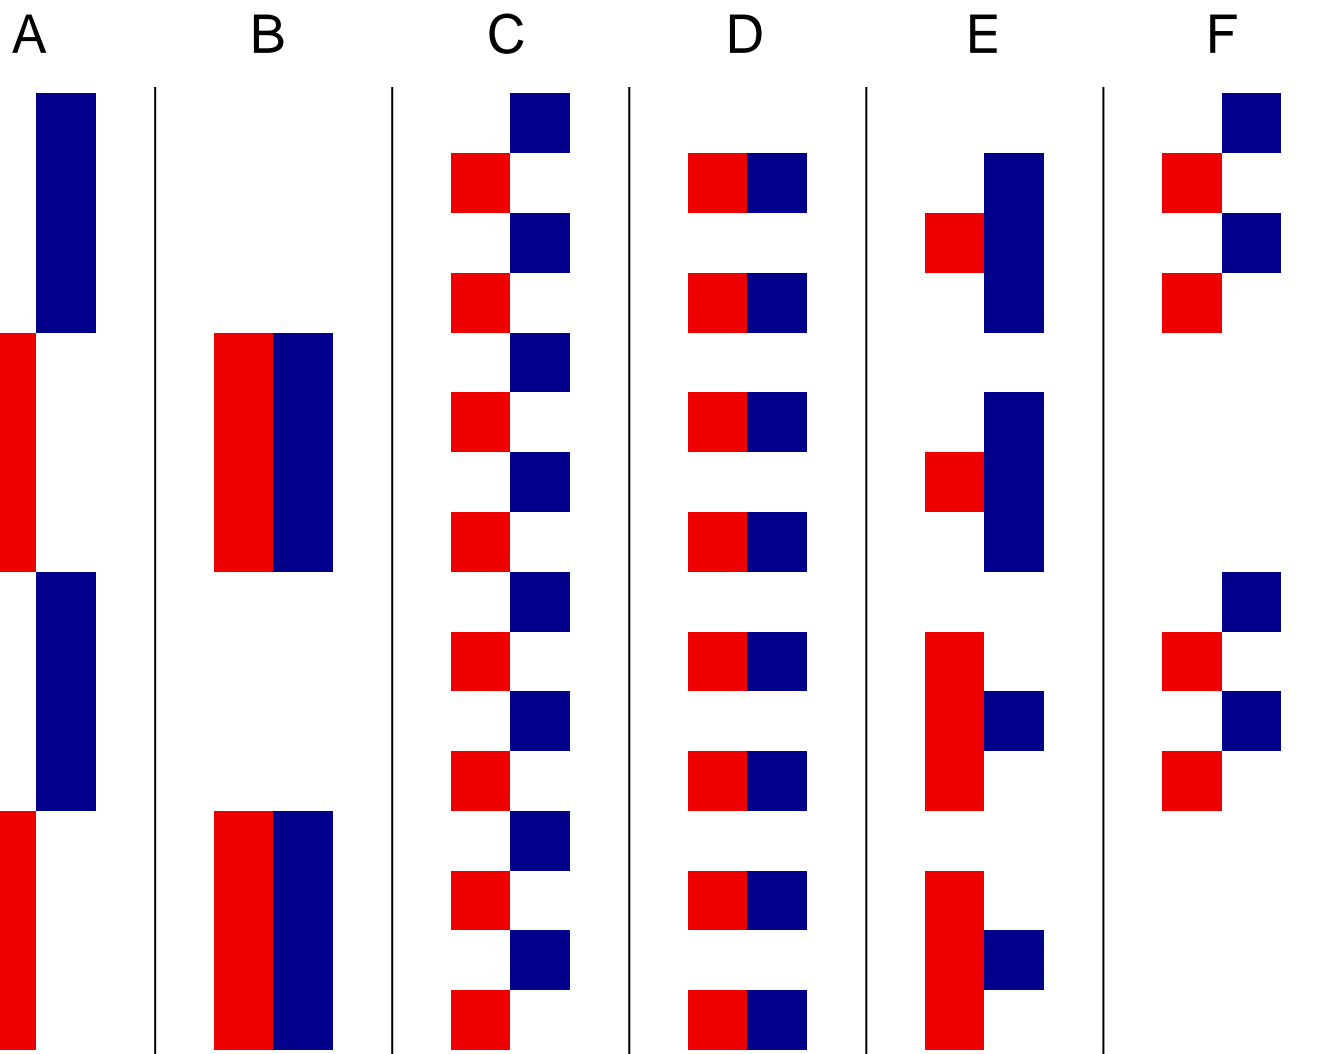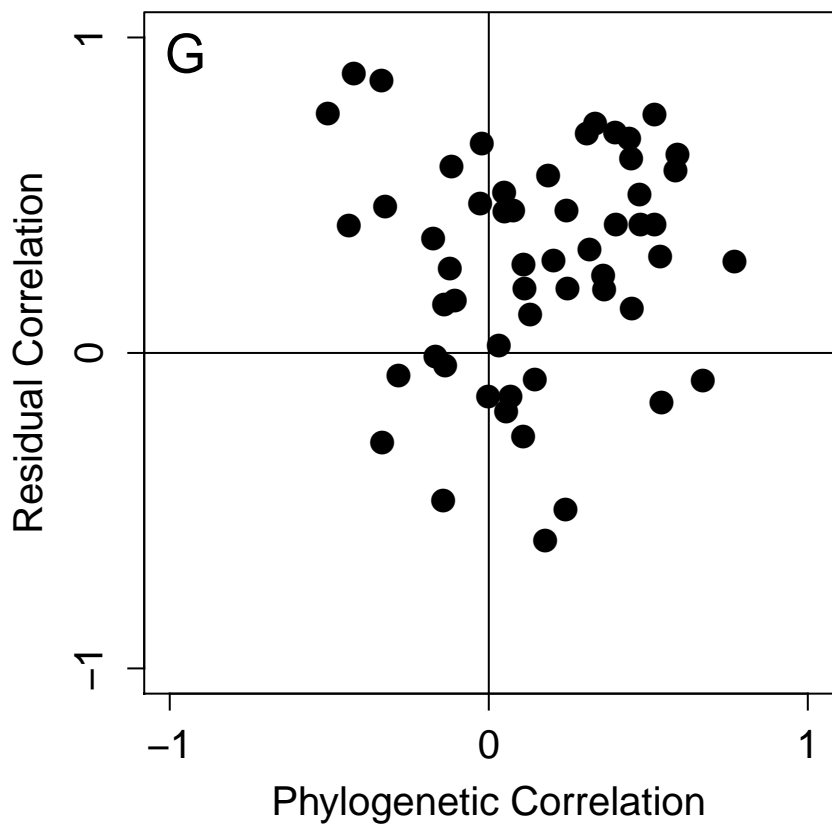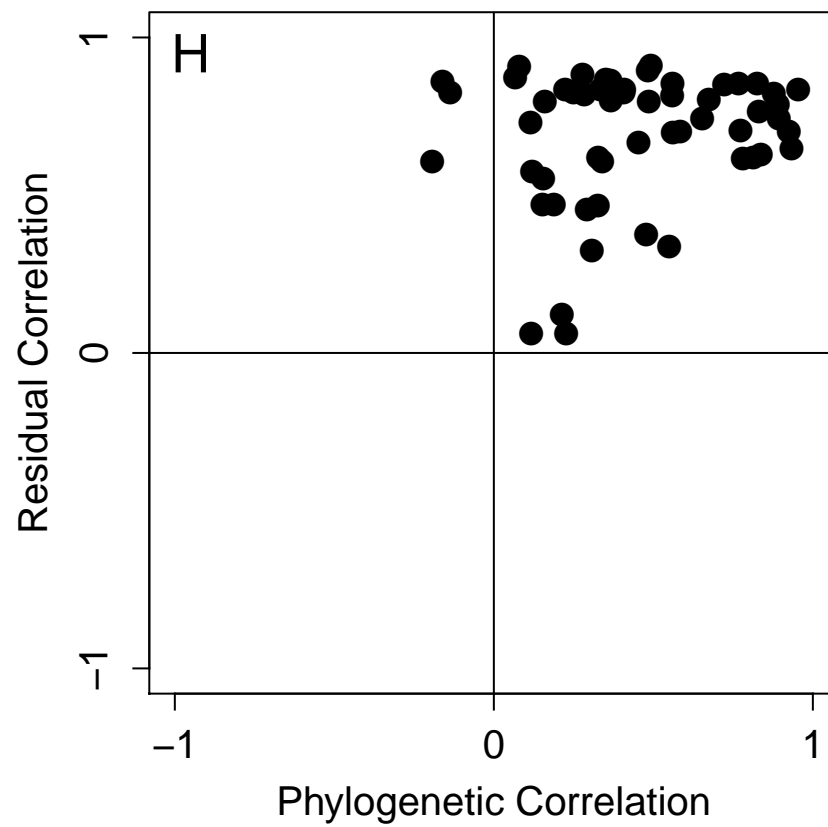



A

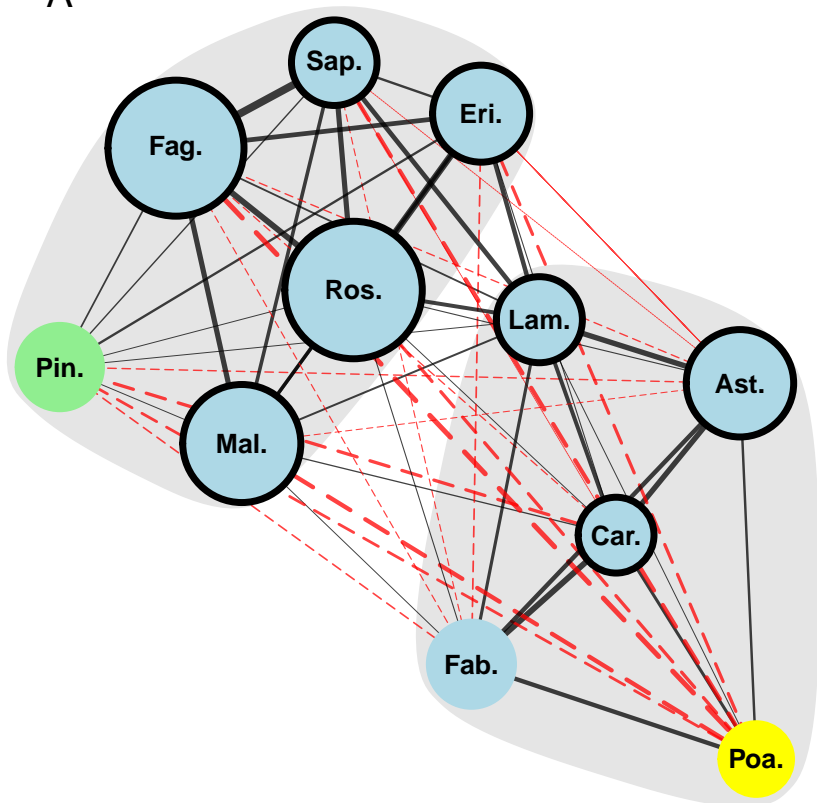

B

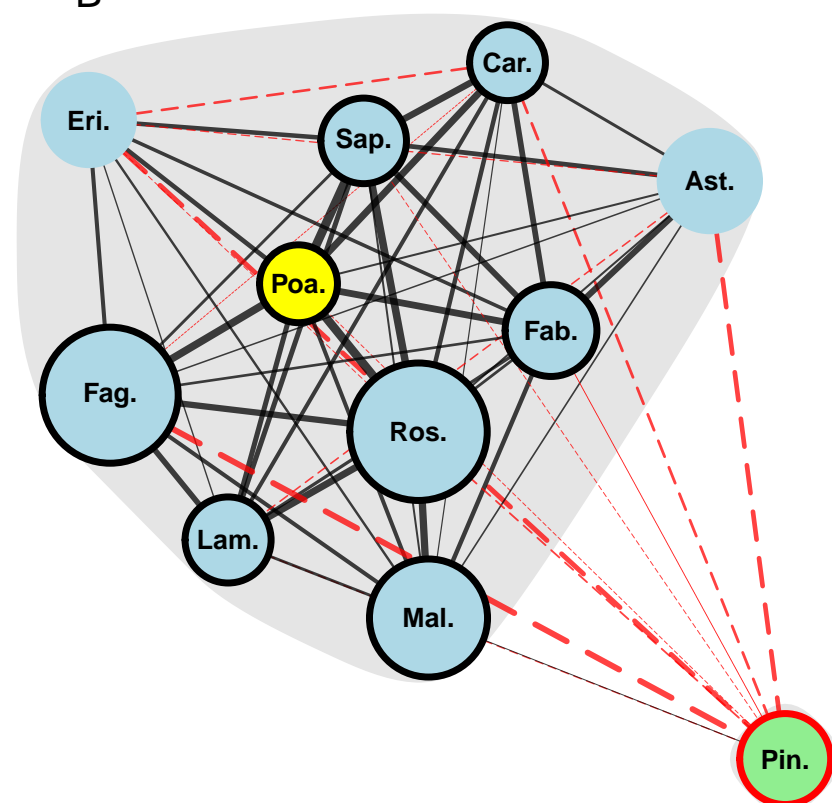

C

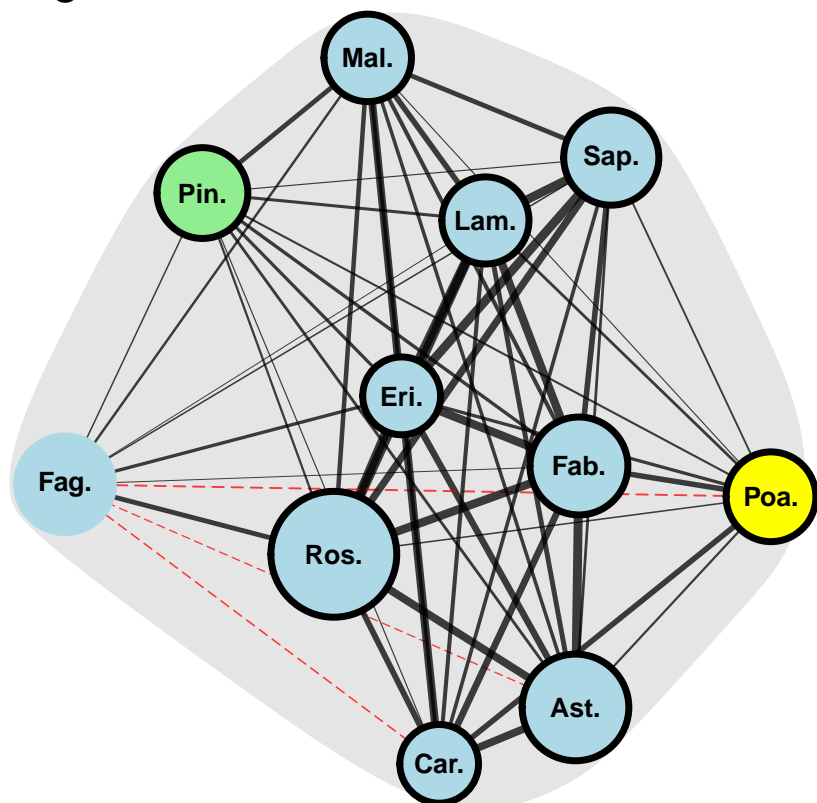

D

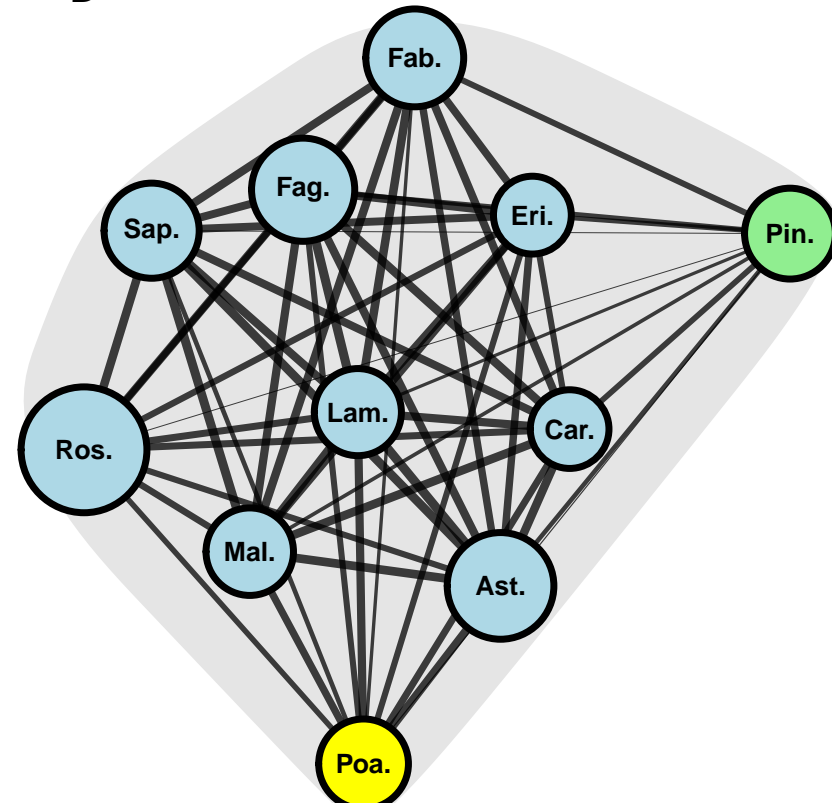

## 1 Supplementary Methods

2

### 3 **Phylogeny reconstruction**

4 Phylogenetic datasets were assembled from published DNA sequence data using the PHLAWD  
5 megaphylogeny pipeline (Smith et al. 2009). The Lepidoptera dataset consisted of 7470 sites sampled  
6 from 9 loci across 1604 species. The Hemiptera dataset comprised 9,015 sites sampled from 15 loci  
7 across 955 species. For each taxon (Lepidoptera and Hemiptera), we used the NCBI taxonomy as a  
8 constraint tree in a ML search under a GTR nucleotide substitution model with CAT-approximated  
9 among-site rate variation, with model parameters estimated independently for each locus. Using  
10 RAxML (Stamatakis 2014), we estimated phylogenies from 100 non-parametric bootstrap replicates of  
11 the multiple sequence alignment supermatrix and then used every fifth bootstrap tree as the starting tree  
12 for optimization of the empirical data. We scaled the branch lengths of the ML tree to time using  
13 Penalized Likelihood, assuming an autocorrelated model of among-lineage rate variation and selecting  
14 a value for the smoother parameter with a cross-validation procedure (treePL; Smith and O'Meara  
15 2012).

16 We calibrated the Lepidoptera divergence time estimates with 4 constraints: The age of the root,  
17 which corresponds to the crown node of Apoditrysia, was fixed at 140 Ma, to match the the published  
18 estimate of Wahlberg et al. (2013). Uniform constraint with a minimum age of 65 Ma and a maximum  
19 age of 140 were placed on the crown nodes of Gracillariidae, Noctuidae, and Nymphalidae based on  
20 the minimum age estimates of fossil taxa (Kozlov 1988; Martins-Neto 1989). We calibrated Hemiptera  
21 divergence time estimates with five constraints. The age of the Hemiptera root was fixed 291 Ma, to  
22 match the published median estimate of Misof et al. (2014). A minimum age of 140 and maximum age  
23 of 291 Ma were imposed on the crown node of Aphidomorpha (Brodie 1845). A minimum age of 99  
24 and a maximum age of 291 were placed on the crown node of Pemphiginae and that of Coccidae  
25 (Kononova 1977; Veà and Grimaldi 2015). A minimum age of 197 and a maximum age of 291 were  
26 placed on the crown node of Heteroptera (Giebel 1856).

27

### 28 **Network Structure Analysis**

29 To characterize the host-use association network structure, we produced a dendrogram of host-  
30 use associations from a Euclidean distance matrix calculated from the pairwise correlations between  
31 presence on the focal hosts. Agglomerative hierarchical clustering was performed by the hclust function  
32 in the R package fastcluster (Müllner 2013). After obtaining the dendrogram of host-use associations,  
33 we evaluated all possible module divisions produced by pruning the dendrogram at a single branch  
34 height. The fit of a given module structure was defined as the sum of all correlations between host-use  
35 traits in the same module minus the sum of all correlations between host-use traits in different modules.  
36 Thus, positive correlations within modules and negative correlations between modules increased the fit  
37 score, while negative correlations within modules and positive correlations between modules reduced  
38 the fit score. The module structure with the highest fit score was chosen as the best characterization of  
39 network structure.

40

41

## 42 Literature Cited

43

44 Brodie, P. B. 1845. A History of the Fossil Insects in the Secondary Rocks of England. John Van  
45 Voorst.

46 Giebel, C. G. 1856. Die Insekten und Spinnen. *in* Fauna der Vorwelt mit steter Breucksichtigung der  
47 lebenden Thiere, Brodhaus, Leipzig.

- 48 Kononova, E. L. 1977. New aphid species (Homoptera, Aphidinea) from the Upper Cretaceous deposits  
49 of the Taymyr. *Rev. d'Entomologie l'URSS* 56:588–600.
- 50 Kozlov, M. V. 1988. Papilionida. Pp. 22–55 in Ponomarenko, ed. *Cretaceous Biosynthetic crisis in the*  
51 *evolution of insects*.
- 52 Martins-Neto, R. G. 1989. Novos insectos terciarios du Estado de São Paulo. *Rev. Bras. Geociencias*  
53 19:375–386.
- 54 Misof, B., S. Liu, K. Meusemann, R. S. Peters, A. Donath, C. Mayer, P. B. Frandsen, J. Ware, T. Flouri,  
55 R. G. Beutel, O. Niehuis, M. Petersen, F. Izquierdo-Carrasco, T. Wappler, J. Rust, A. J. Aberer, U.  
56 Aspöck, H. Aspöck, D. Bartel, A. Blanke, S. Berger, A. Böhm, T. R. Buckley, B. Calcott, J. Chen, F.  
57 Friedrich, M. Fukui, M. Fujita, C. Greve, P. Grobe, S. Gu, Y. Huang, L. S. Jermin, A. Y. Kawahara, L.  
58 Krogmann, M. Kubiak, R. Lanfear, H. Letsch, Y. Li, Z. Li, J. Li, H. Lu, R. Machida, Y. Mashimo, P.  
59 Kapli, D. D. McKenna, G. Meng, Y. Nakagaki, J. L. Navarrete-Heredia, M. Ott, Y. Ou, G. Pass, L.  
60 Podsiadlowski, H. Pohl, B. M. von Reumont, K. Schütte, K. Sekiya, S. Shimizu, A. Slipinski, A.  
61 Stamatakis, W. Song, X. Su, N. U. Szucsich, M. Tan, X. Tan, M. Tang, J. Tang, G. Timelthaler, S.  
62 Tomizuka, M. Trautwein, X. Tong, T. Uchifune, M. G. Walz, B. M. Wiegmann, J. Wilbrandt, B.  
63 Wipfler, T. K. F. Wong, Q. Wu, G. Wu, Y. Xie, S. Yang, Q. Yang, D. K. Yeates, K. Yoshizawa, Q.  
64 Zhang, R. Zhang, W. Zhang, Y. Zhang, J. Zhao, C. Zhou, L. Zhou, T. Ziesmann, S. Zou, X. Xu, H.  
65 Yang, J. Wang, K. M. Kjer, and X. Zhou. 2014. Phylogenomics resolves the timing and pattern of insect  
66 evolution. *Science* 346:763–767.
- 67 Müllner, D. 2013. fastcluster: Fast hierarchical, agglomerative clustering routines for R and Python. *J.*  
68 *Stat. Softw.* 53:1–18.
- 69 Smith, S. A., J. M. Beaulieu, and M. J. Donoghue. 2009. Mega-phylogeny approach for comparative  
70 biology: an alternative to supertree and supermatrix approaches. *BMC Evol. Biol.* 9:37.
- 71 Smith, S. A., and B. C. O'Meara. 2012. treePL: divergence time estimation using penalized likelihood  
72 for large phylogenies. *Bioinformatics* 28:2689–2690.
- 73 Stamatakis, A. 2014. RAxML version 8: a tool for phylogenetic analysis and post-analysis of large  
74 phylogenies. *Bioinformatics* 30:1312–3.
- 75 Veà, I. M., and D. A. Grimaldi. 2015. Diverse new scale insects (Hemiptera: Coccoidea) in amber from  
76 the Cretaceous and Eocene with a phylogenetic framework for fossil Coccoidea. *Am. Museum Novit.*  
77 3823:1–15.
- 78 Wahlberg, N., C. W. Wheat, and C. Peña. 2013. Timing and patterns in the taxonomic diversification of  
79 Lepidoptera (butterflies and moths). *PLoS One* 8:1–8.
- 80
